# Supplementary material for: Restoring calcium homeostasis in Purkinje cells arrests neurodegeneration and neuroinflammation in the ARSACS mouse model
Source: PubMed Central journal article supplement (PMC10371240; doi:10.1172/jci.insight.163576), 2023-06-22
Supplement: jciinsight-8-163576-s156.pdf [file jciinsight-8-163576-s156.pdf]

|                     | <i>Sacs</i> <sup>+/+</sup> +V | <i>Sacs</i> <sup>+/+</sup> +CEF | <i>Sacs</i> <sup>-/-</sup> +V | <i>Sacs</i> <sup>-/-</sup> +CEF | Physiological range |
|---------------------|-------------------------------|---------------------------------|-------------------------------|---------------------------------|---------------------|
|                     | Mean ± SD                     | Mean ± SD                       | Mean ± SD                     | Mean ± SD                       |                     |
| <b>RBC (M/μL)</b>   | 11.2 ± 0.2                    | 10.4 ± 0.2                      | 10.8 ± 0.4                    | 10.8 ± 0.4                      | 8,60-11             |
| <b>HGB (g/dL)</b>   | 15.5 ± 0.3                    | 14.7 ± 0.2                      | 15.0 ± 0.6                    | 15.1 ± 0.5                      | 12,5-16             |
| <b>HCT (%)</b>      | 51.8 ± 0.8                    | 48.8 ± 0.3                      | 49.6 ± 1.8                    | 49.6 ± 1.6                      | 39-55               |
| <b>MCV (fL)</b>     | 46.3 ± 1.2                    | 46.9 ± 0.7                      | 46.1 ± 0.2                    | 45.8 ± 0.7                      | 42-48               |
| <b>MCH (pg)</b>     | 13.9 ± 0.2                    | 14.1 ± 0.2                      | 13.9 ± 0.3                    | 13.9 ± 0.3                      | 13,5-15,5           |
| <b>MCHC (g/dL)</b>  | 30.0 ± 0.4                    | 30.1 ± 0.2                      | 30.1 ± 0.7                    | 30.4 ± 0.2                      | 30-34               |
| <b>PLT (K/μL)</b>   | 1332.3 ± 91.7                 | 1266.7 ± 496.4                  | 1288.3 ± 245.8                | 1197.6 ± 195.5                  | 750-1200            |
| <b>WBC (K/μL)</b>   | 5.4 ± 0.9                     | 4.6 ± 0.6                       | 5.3 ± 1.3                     | 6.8 ± 2.1                       | 3,5-10              |
| <b>NEUT (%)</b>     | 21.2 ± 4.9                    | 16.3 ± 5.7                      | 14.8 ± 6.9                    | 14.1 ± 7.7                      | 10-20               |
| <b>LYMPH (%)</b>    | 76.3 ± 5.3                    | 80.4 ± 5.5                      | 82.7 ± 7.1                    | 83.3 ± 8.8                      | 65-85               |
| <b>ALB (g/dL)</b>   | 3.0 ± 0.1                     | 3.0 ± 0.2                       | 3.1 ± 0.2                     | 3.0 ± 0.2                       | 2,7-3,6             |
| <b>ALT (U/L)</b>    | 46.7 ± 15.6                   | 45.7 ± 10.0                     | 53.5 ± 23.2                   | 43.5 ± 13.5                     | 0-70                |
| <b>Crea (mg/dL)</b> | 0.3 ± 0.0                     | 0.3 ± 0.0                       | 0.2 ± 0.1                     | 0.3 ± 0.0                       | 0,31-0,40           |
| <b>Urea (mg/dL)</b> | 36.3 ± 9.3                    | 39.0 ± 11.8                     | 43.5 ± 9.9                    | 50.2 ± 6.9                      | 35-50               |
